# Supplementary material for: Solid state concentration quenching of organic fluorophores in PMMA
Source: Royal Society of Chemistry journal article supplement (doi:10.1039/c4cp05244g), 2014-11-21

## Supporting Information: Solid State Concentration Quenching of Organic Fluorophores in PMMA

In this supporting information are the individual plots of  $\log_{10}k_{CQ}$  vs  $\log_{10}R$  for each of the seven fluorophores studied. This is to exhibit the error bars omitted from Figure 5 to reduce clutter.

### Rhodamine 6G;

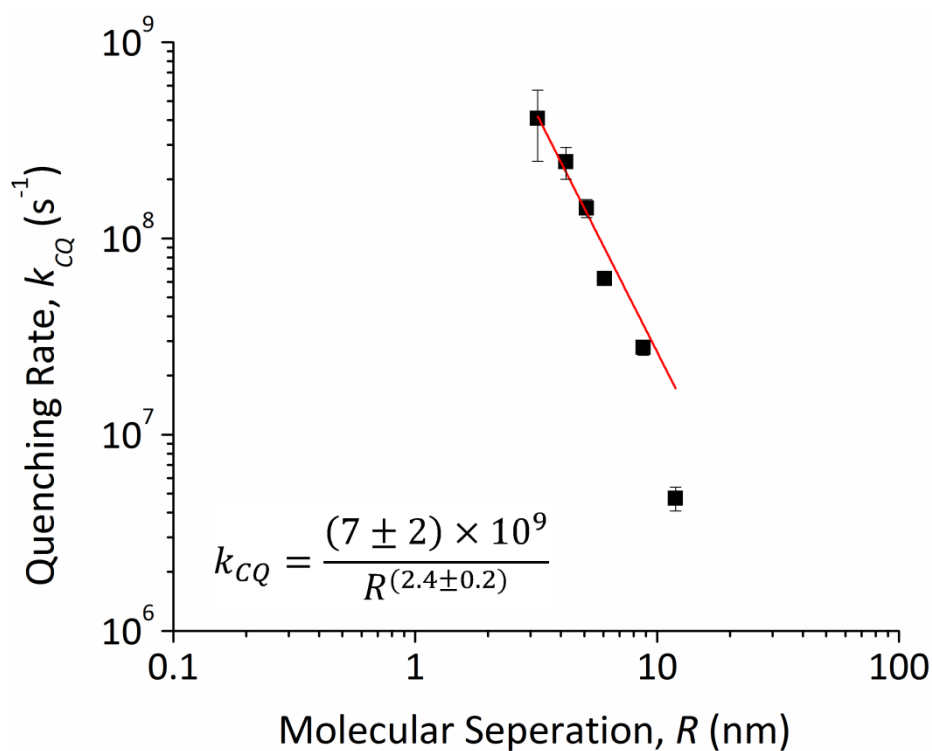

### Pyridine 2;

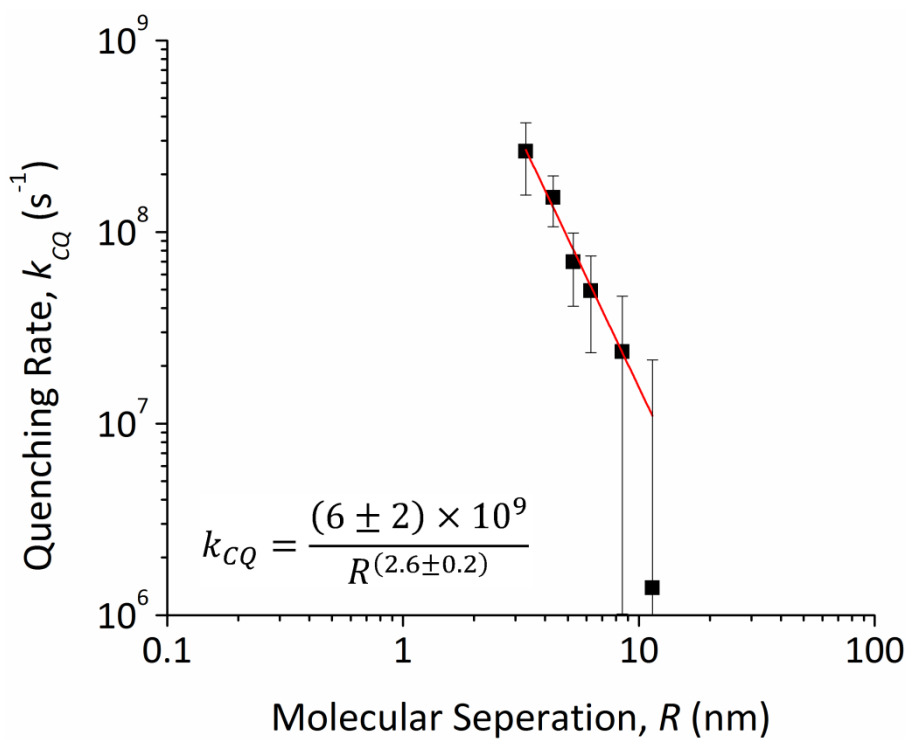

### Lumogen F Red 305;

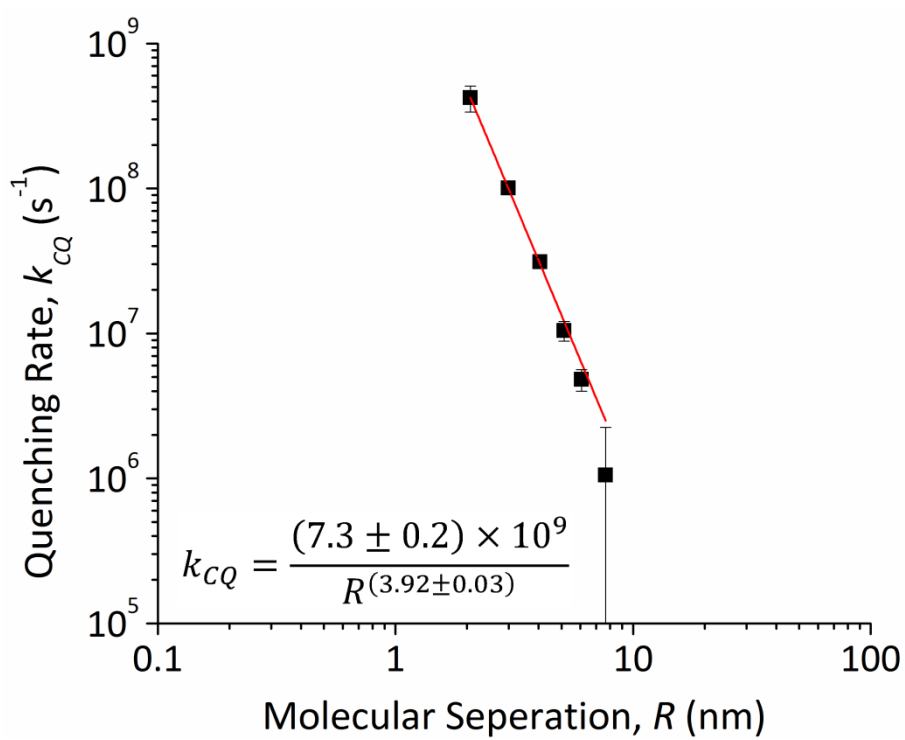

### Perylene;

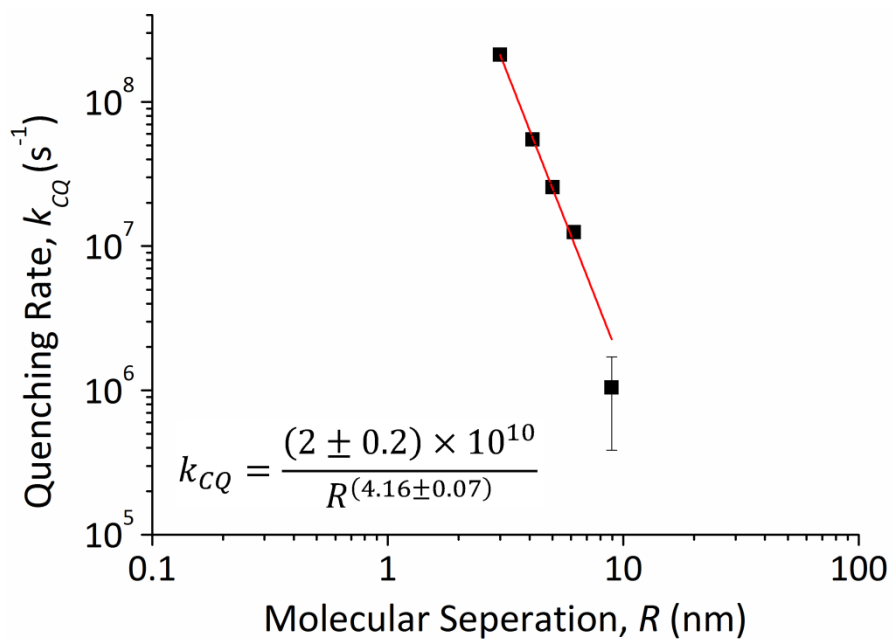

### Coumarin 102;

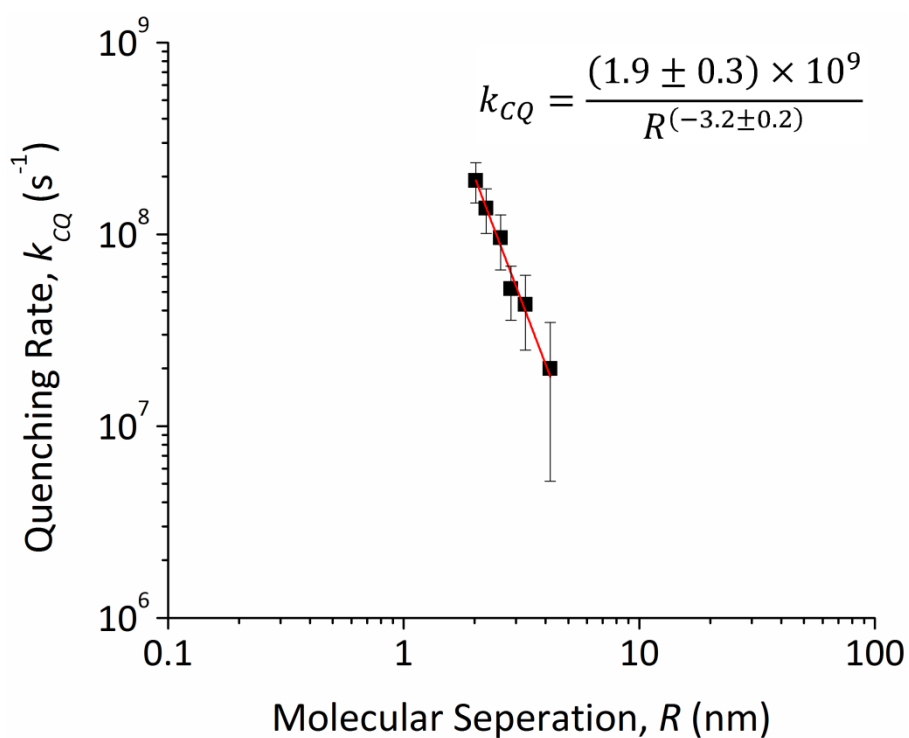

DCM;

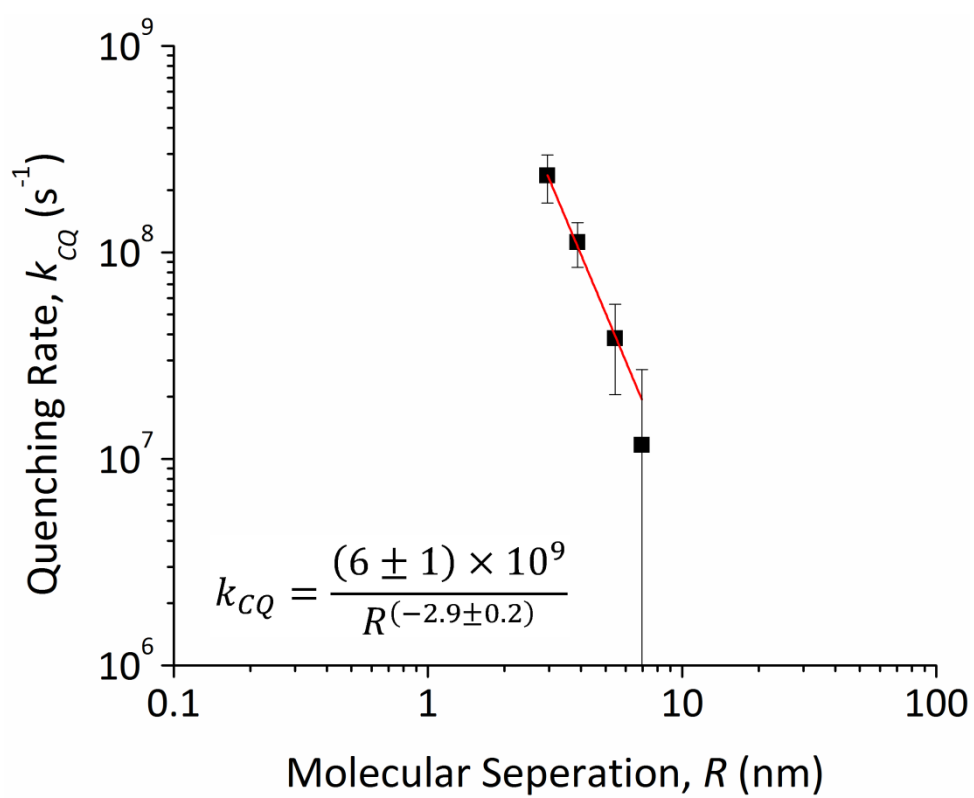

DCJTB;

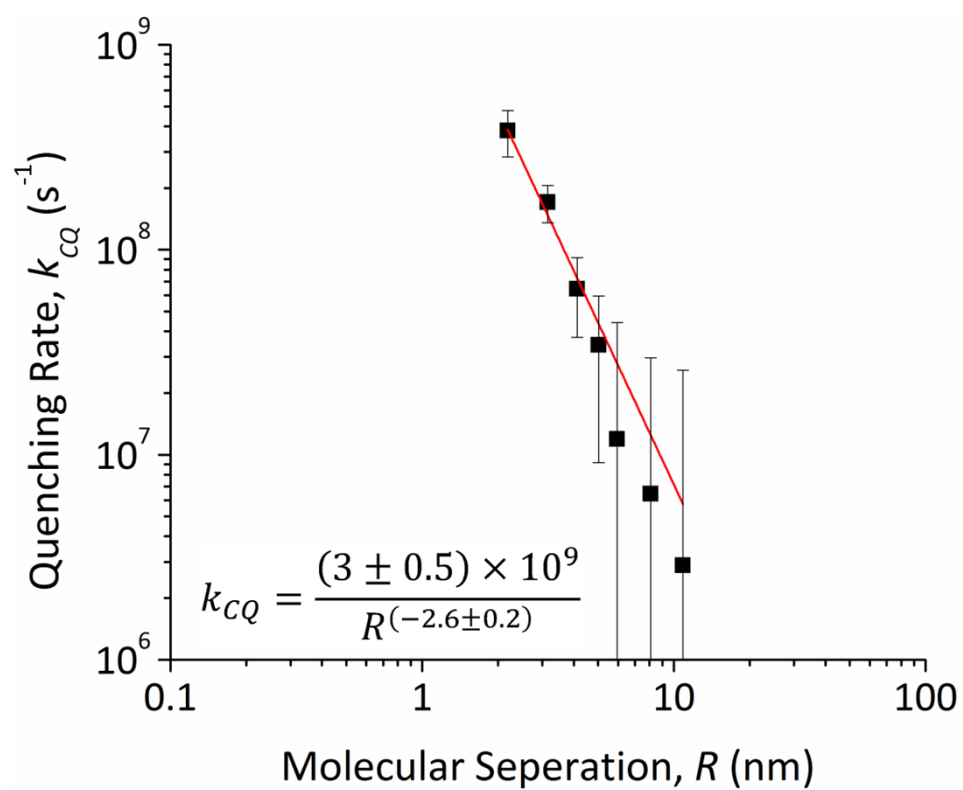

Supplement: c4cp05244g1.pdf [file c4cp05244g1.pdf]
